# Supplementary material for: Shaping the Future of Obesity Treatment: In Silico Multi-Modeling of IP6K1 Inhibitors for Obesity and Metabolic Dysfunction
Source: MDPI journal article supplement (doi:10.3390/ph17020263), 2024-02-19
Supplement: s1 [file s1]

# Shaping the Future of Obesity Treatment: *In Silico* Multi-Modeling of IP6K1 Inhibitors for Obesity and Metabolic Dysfunction

Ismail Mondal<sup>1</sup>, Nirupam Pattanayak<sup>1</sup>, Sudip Kumar Mandal<sup>1</sup>, Amit Kumar Halder<sup>1,2</sup>, M.

Natalia D. S. Cordeiro<sup>2\*</sup>

<sup>1</sup>Dr. B. C. Roy College of Pharmacy and Allied Health Sciences, Dr. Meghnad Saha Sarani, Bidhannagar, Durgapur 713206, West Bengal, India

<sup>2</sup>LAQV@REQUIMTE/Department of Chemistry and Biochemistry, Faculty of Sciences, University of Porto, 4169-007 Porto, Portugal.

\* **Corresponding author:** M. Natalia D. S. Cordeiro, [ncordeir@fc.up.pt](mailto:ncordeir@fc.up.pt)

## Associated content:

**Figure S1.** Ramachandran plot of the generated homology model for IP6K1.

**Figure S2.** The docked poses of (A) the most active (**21**) and (B) the least active compound (**10**).

**Figure S3.** 2D structures of the dataset compounds (**3-24**)

**Figure S4.** 2D structures of the dataset compounds (**25-42**)

**Figure S5.** The Boiled-egg plot of three most potent compounds of the datasets (**15**, **20** and **21**)

**Table S2.** The ADMET properties of three most potent compounds of the datasets (**15**, **20** and **21**)

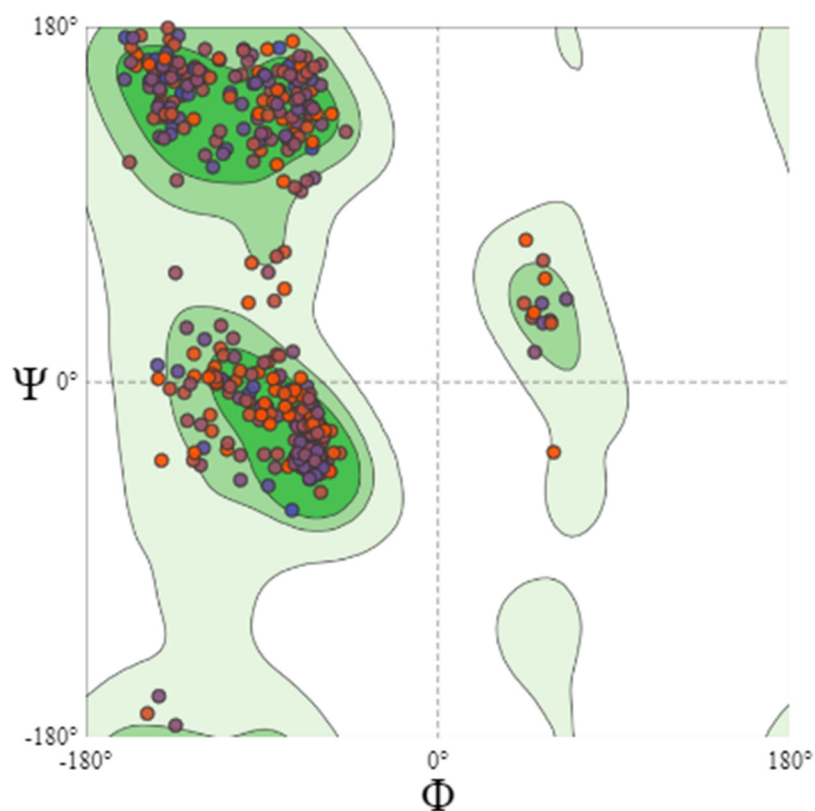

**Figure S1.** Ramachandran plot of the generated homology model for IP6K1.

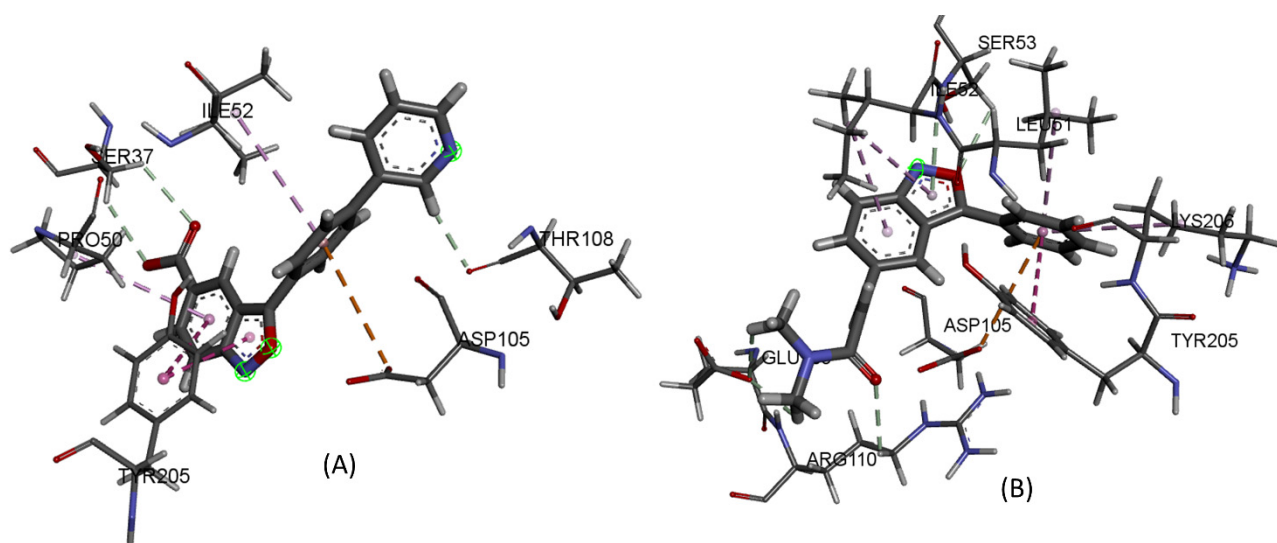

**Figure S2.** The docked poses of (A) the most active (**21**) and (B) the least active compound (**10**)

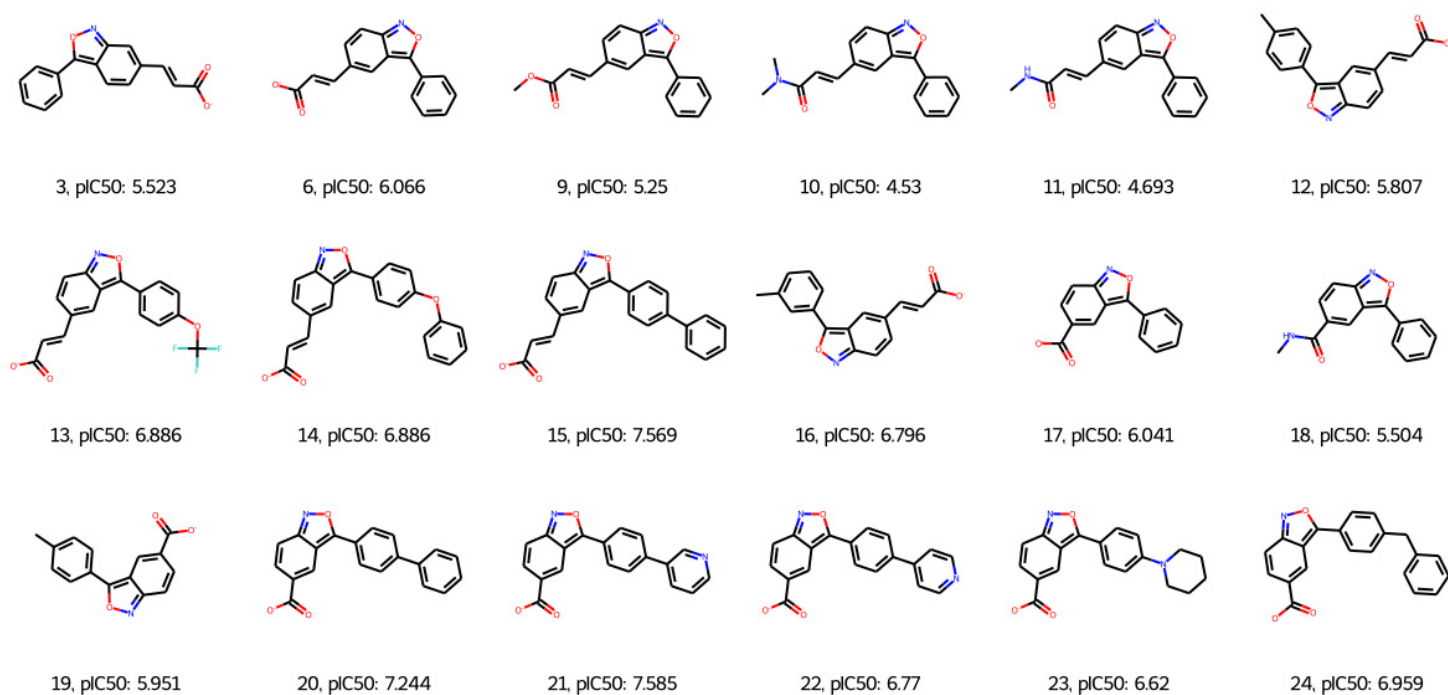

**Figure S3.** 2D structures of the dataset compounds (3-24)

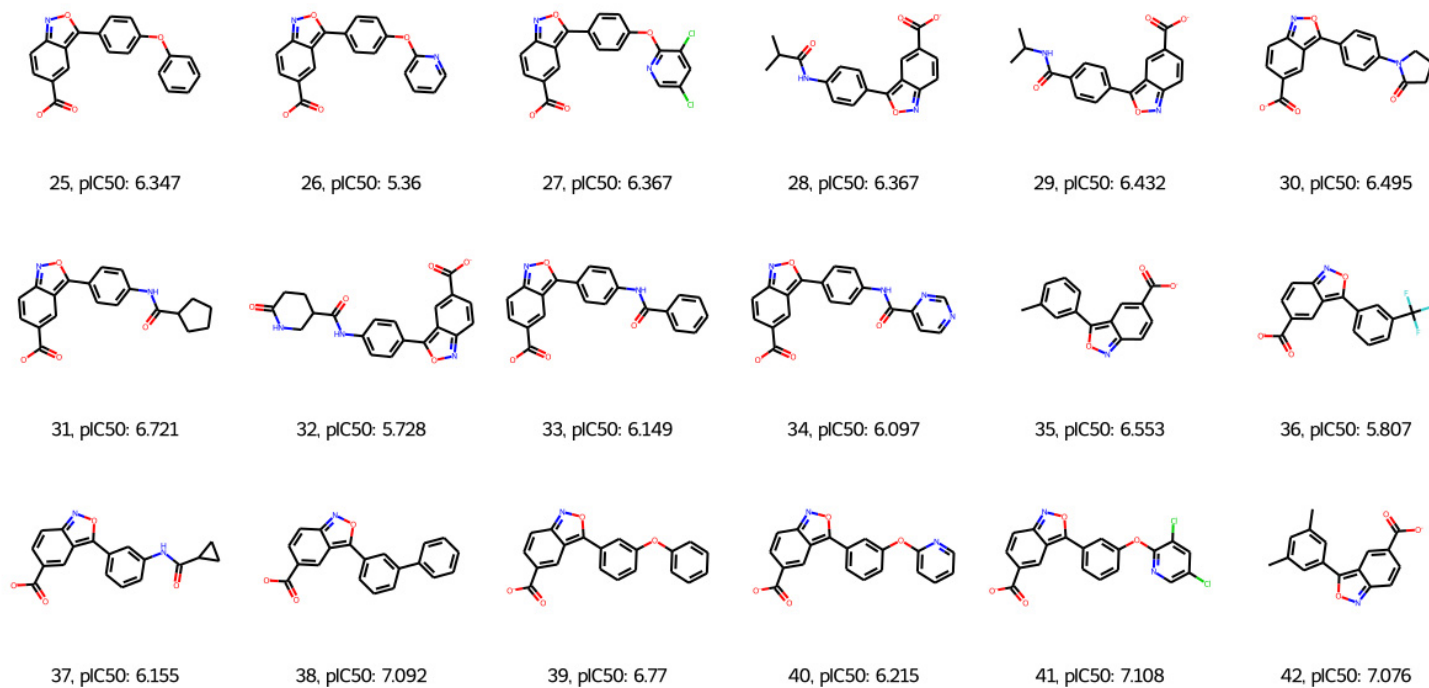

**Figure S4.** 2D structures of the dataset compounds (25-42)

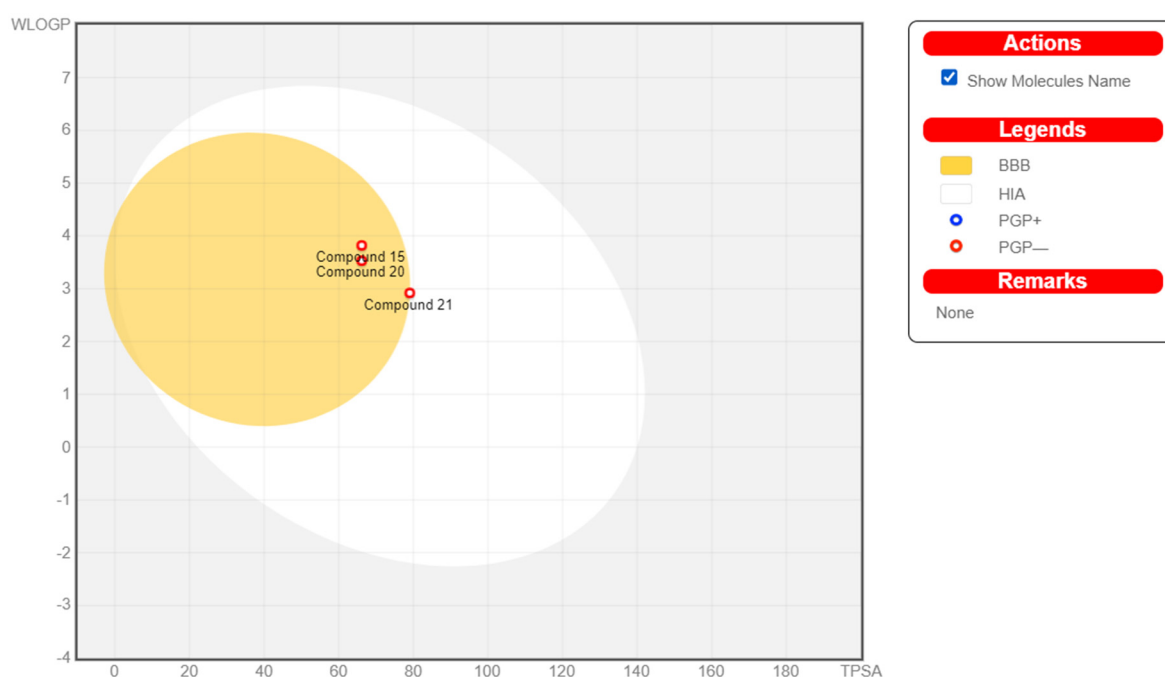

**Figure S5.** The Boiled-egg plot of three most potent compounds of the datasets (**15**, **20** and **21**)

**Table S2.** The ADMET properties of three most potent compounds of the datasets (**15**, **20** and **21**)

| ADMET property            | Compound 21 | Compound 15 | Compound 20 |
|---------------------------|-------------|-------------|-------------|
| Ames mutagenesis          | -           | -           | -           |
| Acute Oral Toxicity (c)   | III         | III         | III         |
| Androgen receptor binding | +           | +           | +           |
| Aromatase binding         | +           | +           | +           |
| Blood Brain Barrier       | +           | +           | +           |
| BRCP inhibitor            | -           | -           | +           |
| Biodegradation            | -           | -           | -           |
| BSEP inhibitor            | +           | +           | +           |
| Caco-2                    | -           | -           | -           |
| Carcinogenicity (binary)  | -           | -           | -           |
| CYP1A2 inhibition         | +           | +           | +           |
| CYP2C19 inhibition        | -           | +           | -           |

|                                             |              |                 |              |
|---------------------------------------------|--------------|-----------------|--------------|
| CYP2C8 inhibition                           | +            | +               | +            |
| CYP2C9 inhibition                           | -            | -               | -            |
| CYP2C9 substrate                            | -            | -               | -            |
| CYP2D6 inhibition                           | -            | -               | -            |
| CYP2D6 substrate                            | -            | -               | -            |
| CYP3A4 inhibition                           | -            | -               | -            |
| CYP3A4 substrate                            | -            | -               | -            |
| CYP inhibitory promiscuity                  | -            | +               | -            |
| Eye corrosion                               | -            | -               | -            |
| Eye irritation                              | -            | +               | -            |
| Estrogen receptor binding                   | +            | +               | +            |
| Glucocorticoid receptor binding             | +            | +               | +            |
| Hepatotoxicity                              | +            | +               | +            |
| Human Ether-a-go-go-Related Gene inhibition | -            | +               | -            |
| Human Intestinal Absorption                 | +            | +               | +            |
| Human oral bioavailability                  | +            | +               | +            |
| MATE1 inhibitor                             | -            | -               | -            |
| Mitochondrial toxicity                      | -            | -               | -            |
| Micronuclear                                | +            | +               | +            |
| Nephrotoxicity                              | -            | -               | +            |
| Acute Oral Toxicity                         | 2.382        | 1.712           | 2.283        |
| OATP1B1 inhibitor                           | +            | +               | +            |
| OATP1B3 inhibitor                           | +            | +               | +            |
| OATP2B1 inhibitor                           | -            | -               | -            |
| OCT1 inhibitor                              | -            | -               | -            |
| OCT2 inhibitor                              | -            | -               | -            |
| P-glycoprotein inhibitor                    | -            | -               | -            |
| P-glycoprotein substrate                    | -            | -               | -            |
| PPAR gamma                                  | +            | +               | +            |
| Plasma protein binding                      | 0.895        | 0.961           | 1.001        |
| Reproductive toxicity                       | +            | +               | +            |
| Respiratory toxicity                        | +            | +               | +            |
| Skin corrosion                              | -            | -               | -            |
| Skin irritation                             | -            | -               | -            |
| skin sensitisation                          | -            | -               | -            |
| Subcellular localisation                    | Mitochondria | Plasma membrane | Mitochondria |
| Thyroid receptor binding                    | +            | +               | +            |
| UGT catalysed                               | -            | -               | -            |
| Water solubility                            | -3.862       | -4.144          | -3.864       |

---
